## Review Article

# Transcriptional control of ribosome biogenesis in yeast: links to growth and stress signals

 David Shore, Sevil Zencir and Benjamin Albert\*

Department of Molecular Biology, Institute of Genetics and Genomics of Geneva (iGE3), 30 Quai Ernest-Ansermet, Geneva 4 CH-1211, Switzerland

**Correspondence:** David Shore (David.Shore@unige.ch) or Benjamin Albert (Benjamin.Albert@univ-tlse3.fr)

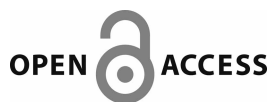

Ribosome biogenesis requires prodigious transcriptional output in rapidly growing yeast cells and is highly regulated in response to both growth and stress signals. This minireview focuses on recent developments in our understanding of this regulatory process, with an emphasis on the 138 ribosomal protein genes (RPGs) themselves and a group of >200 ribosome biogenesis (RiBi) genes whose products contribute to assembly but are not part of the ribosome. Expression of most RPGs depends upon Rap1, a pioneer transcription factor (TF) required for the binding of a pair of RPG-specific TFs called Fhl1 and Ifh1. RPG expression is correlated with Ifh1 promoter binding, whereas Rap1 and Fhl1 remain promoter-associated upon stress-induced down regulation. A TF called Sfp1 has also been implicated in RPG regulation, though recent work reveals that its primary function is in activation of RiBi and other growth-related genes. Sfp1 plays an important regulatory role at a small number of RPGs where Rap1–Fhl1–Ifh1 action is subsidiary or non-existent. In addition, nearly half of all RPGs are bound by Hmo1, which either stabilizes or re-configures Fhl1–Ifh1 binding. Recent studies identified the proline rotamase Fpr1, known primarily for its role in rapamycin-mediated inhibition of the TORC1 kinase, as an additional TF at RPG promoters. Fpr1 also affects Fhl1–Ifh1 binding, either independently or in cooperation with Hmo1. Finally, a major recent development was the discovery of a protein homeostasis mechanism driven by unassembled ribosomal proteins, referred to as the Ribosome Assembly Stress Response (RASTR), that controls RPG transcription through the reversible condensation of Ifh1.

## Introduction

Ribosome biogenesis is probably the most energy-intensive anabolic processes carried out in growing cells [1–3]. In rapidly growing budding yeast (*Saccharomyces cerevisiae*) ribosomes are produced at a rate of ~2000 per minute and are present in ~200 000 copies per cell. This requires not only the dedication of more than half of all RNAPII initiation events to RP or RiBi genes, but a prodigious output of ribosomal RNA (rRNA), synthesized by the combined action of RNAPI and RNAPIII. The production of RPs and rRNAs is assumed to be highly coordinated in order to ensure rapid and efficient ribosome assembly [2]. At least in yeast, this coordination begins at the level of transcription, which is stimulated under environmental conditions that favor rapid growth and down-regulated under all stress conditions so far examined [1,4]. Here we will focus on recent advances in our understanding of mechanisms underlying RP and RiBi gene regulation, with passing reference to their coordination with rRNA production.

## Three distinct RPG promoter architectures lead to extensive but incomplete co-regulation

Work over many years has revealed a common set of TFs bound to most RPG upstream regulatory regions (hereafter referred to as promoters; [5–16]). The first to be identified was Rap1 (Repressor/

\*Present address: Molecular, Cellular and Developmental Biology (MCD), Center for Integrative Biology (CBI), University of Toulouse CNRS/UPS, Bâtiment IBCG, 118, route de Narbonne, 31062 Toulouse cedex 9, France

Received: 10 May 2021  
 Revised: 14 June 2021  
 Accepted: 18 June 2021

Version of Record published:  
 9 July 2021

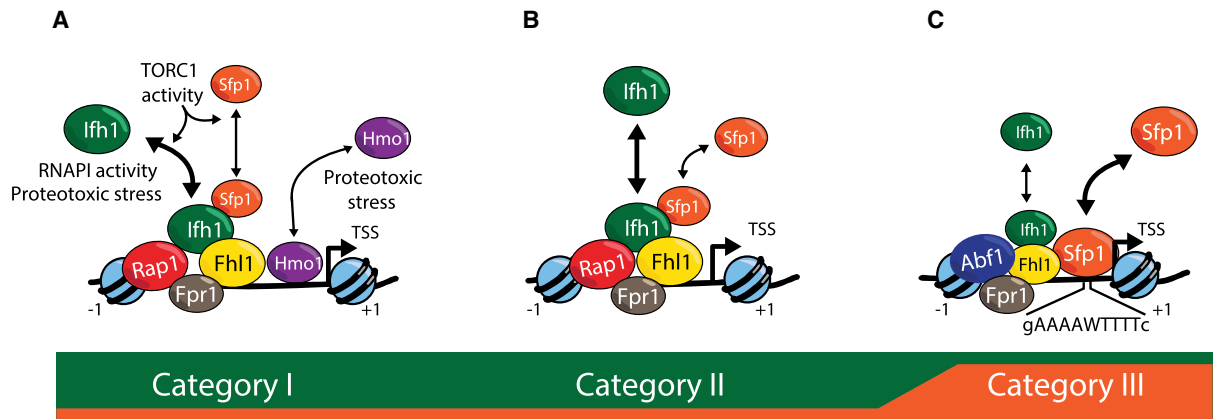

**Figure 1. Schematic representation of the three categories of RPG promoter architecture.**

The color code (below) is indicative of the relative contributions of Ifh1 (green) and Sfp1 (orange) to regulated activation. The regulation of Ifh1 binding by proteotoxic stress and RNAPI activity applies at all categories, as does the regulated binding of both Ifh1 and Sfp1 by TORC1 activity (see text for details). The average position of known transcription factors is shown, together with the stable +1 and –1 nucleosomes. Category I (A) and II (B) promoters have been proposed to harbor two or one unstable ('fragile') nucleosomes bound by the chromatin remodeler RSC ([10,88,89]; not shown here) between the indicated +1 and –1 stable nucleosomes, respectively [10,88,89], though this view is controversial [90,91]. Note that the representation of Category III (C) promoters is a composite of various configurations, with Abf1, Fpr1, and Fhl1 present at only a fraction of these promoters, and Rap1 present in place of Abf1 at some. The most ubiquitous feature of Category III promoters would appear to be Sfp1 binding.

activator protein 1), one of a small number of so-called general regulatory factors (GRFs) in yeast [17–21] with features similar to those of mammalian pioneer factors [22]. Although one finds Rap1 at most (127 out of 138) RPG promoters, it binds to an even larger number of other promoters [23]. Instead, the TFs Fhl1 (Forkhead-like 1) and Ifh1 (Interacts with forkhead 1) are equally ubiquitous at RPG promoters but also highly specific for these genes [12,14–16,24,25], with very few non-RPG binding sites. The HMGB protein Hmo1 binds to about one-half of the RPGs bound by Rap1–Fhl1–Ifh1, referred to as Category I genes [5,8,10]. Hmo1 binding co-localizes with that of Fhl1–Ifh1, between Rap1 and the transcription start site (TSS; see Figure 1A), but in addition extends further downstream towards the TSS [13]. Category II is comprised of a roughly equal number of genes, all of which are bound by Rap1, Fhl1, and Ifh1, but not Hmo1 (Figure 1B). At Category I and II genes the relative positions of Rap1 and the Fhl1–Ifh1 pair are strictly conserved, though both are closer to the TSS at Category II genes. Most Category I and II genes also display some detectable level of an additional TF, Split zinc-finger protein 1 (Sfp1) at their promoters. Interestingly, Sfp1 binding is equally prevalent at the large group of RiBi genes implicated in ribosome assembly, as discussed in more detail below [6,11,13,26].

The precise role of Hmo1 at Category I RPG promoters is still controversial. Loss of Hmo1 (*hmo1Δ*) has been reported to abolish both Fhl1 and Ifh1 binding at RPG promoters with only minor effects on transcription or cell growth [5], which led Struhl and colleagues to suggest that proteins other than Fhl1 and Ifh1 might play an important role in RPG activation. However, *fhl1Δ* cells display a severe growth defect and a profound global reduction in both rRNA and mRNA [14], unlike *hmo1Δ*, and *ifh1Δ* is lethal. Furthermore, *hmo1Δ* cells are extremely sensitive to Ifh1 depletion compared to wild-type cells [27], clearly indicating the importance of full Ifh1 function even in the absence of Hmo1. We thus argue that the most parsimonious explanation of these data is that loss of Hmo1 may destabilize or alter Fhl1 and Ifh1 binding in such a way that reduces or abrogates their chromatin immunoprecipitation (ChIP) signal while only modestly affecting their ability to activate transcription. Curiously, the proline isomerase and rapamycin target protein Fpr1 (FK506-sensitive proline rotamase 1), which binds to the majority of RPG promoters (Figure 1C), often co-incident with Rap1 [28], also appears to stabilize Fhl1/Ifh1 binding. Fpr1 is discussed in more detail below.

Regulation of the vast majority of RPGs (the Category I and II genes) is thought to operate largely through mechanisms that control the association of Ifh1 with their promoters, based on the observation that stress (e.g.

heat shock or inhibition of the major growth-promoting kinase TORC1 with rapamycin) causes rapid Iffh1 promoter release while leaving both Rap1 and Fhl1 binding unaffected [6,12–15,29]. Anchor-away experiments [30] in which Iffh1 is rapidly depleted from the nucleus in otherwise unstressed cells [31,32] indicate that Iffh1 removal from promoters is by itself sufficient to explain RPG down-regulation under physiological stress conditions. Although Iffh1 is presumed to be a direct activator at RPGs, working through C-terminal activation domains [33], we note that Rap1 itself has been reported to directly activate transcription through interactions either with Taf4, 5, and 12 subunits of TFIID [34,35] or with the Med15 subunit of Mediator [36]. As such, one could imagine that Iffh1 and Rap1 act cooperatively to activate RPGs, or even that Iffh1 works by unmasking or otherwise potentiating Rap1's activation domain. In any event, ChIP analysis points to a major role of Iffh1 in RPG regulation regardless of its mechanism of activation.

Two distinct mechanisms that prevent Iffh1 promoter binding at RPGs under stress conditions have been uncovered. The first to be identified involves a complex containing the ubiquitous casein kinase 2 (CK2), two RiBi proteins (Utp22 and Rrp7) and Iffh1, called CURI [25,37]. The CURI complex titrates Iffh1 away from RPG promoters under conditions where rRNA synthesis is repressed. In cells carrying a mutation in Iffh1 that prevents its association with CURI, or in a strain where RNAPI activity is rendered constitutive through fusion of its Rrn3 and Rpa43 subunits [38], Iffh1 is still rapidly (<5 min) released from RPG promoters following rapamycin treatment but re-binds roughly 20 min later [37]. This finding thus reveals a CURI-dependent long timescale mechanism by which cells can align RPG transcription with that of rRNA but leaves open the question of how Iffh1 is so rapidly removed from RPG promoters in the first place. One attractive hypothesis is that covalent modifications of Iffh1 act to rapidly affect its promoter binding following stress. However, although Iffh1 is modified by both phosphorylation and acetylation [39–43] there is so far no evidence that these modifications are required for its rapid promoter release upon stress. Instead, as will be described below, recent studies indicate that rapid Iffh1 promoter release is provoked by its entrapment in protein aggregates as a consequence of a global impairment of protein homeostasis driven by excess, unassembled RPs [44].

Thirteen of the 138 RPGs, which we have grouped together as Category III genes [10], do not conform to this common promoter architecture and over half of these are instead bound by a different GRF, Abf1, in place of Rap1, and display low levels of both Fhl1 and Iffh1 binding ([10,32,45,46]; Figure 1C). Somewhat surprisingly, the two Category III genes that are bound by Rap1 (*RPL1A* and *RPL18B*), display little or no Fhl1/Iffh1 binding [13,32]. Nearly one-half of Category III genes are also bound by Fpr1, but none by Hmo1. Thus, the Category III genes, though recognized by a similar set of TFs, display a much more heterogeneous promoter architecture. More recent work ([32]; see below) indicates that their most common feature may be direct binding and activation by Sfp1.

Despite these differences in promoter organization, particularly with respect to Category III, all RPGs display remarkably similar up-regulation in response to a glucose pulse or down-regulation in response to two different stress conditions, arrest of secretion by tunicamycin treatment or oxidative stress provoked by diamide addition [32]. Interestingly, though, Category III genes are significantly less down-regulated upon heat shock or when ribosome biogenesis is blocked by the drug diazaborine compared to Category I and II genes [32]. The mechanistic underpinning of these findings and their biological significance will be discussed towards the end of this minireview.

## RPG co-regulation operates through differential deployment of Iffh1 and Sfp1, the primary RiBi gene activator

The observations described above beg the question of what activator(s) might be responsible for regulated activation of Category III RPGs. The roles of Abf1 and Fhl1 were tested by binding site mutagenesis at a limited set of promoters, where mostly modest reductions in expression were observed [45]. Furthermore, Abf1 binding actually appears to increase at these genes following stress [45]. These findings pointed to the existence of an additional key TF at these genes, whose identity was hinted at by the observation that a DNA sequence motif (gAAAATTTTc) bound by Sfp1 *in vitro* [47] is enriched at Category III promoters [32]. Indeed, rapid Sfp1 nuclear depletion leads to strong down-regulation of Category III RPGs, but a much milder effect on both Category I and II genes. Interestingly, just the opposite is true for rapid Iffh1 depletion [32]. Thus, the Category III genes can be considered as a variant of the Category I and II groups in which Sfp1 usurps the primary role

in regulated activation normally carried out by Ifh1. Remarkably, expression of Category III genes nevertheless remains tightly coupled to that of the majority of RPGs under most conditions so far examined, with the exception of proteotoxic stress, as discussed below.

Notably, the Sfp1 binding motif is also found at many RiBi gene promoters, and early studies showed that its rapid overexpression via a galactose-inducible promoter fusion leads to a spike in RiBi gene mRNA levels [6,48]. Nevertheless, Sfp1 binding at RiBi gene promoters (as well as at Category III RPGs) is essentially undetectable by ChIP, and the prevalent view was that the RiBi genes are regulated directly through two repressor pathways, one involving Stb3, which binds to a short motif embedded within the conserved RRPE (ribosomal RNA processing element; [29,47,49–51]) and recruits the RPD3-L histone deacetylation complex [52], the other involving the Dot6/Tod6 pair, which achieves the same end through binding to the so-called PAC box (polymerase A and C; [47,52,53]). Sfp1 was thus presumed to act indirectly to promote RiBi gene expression. However, recent application of the chromatin endogenous cleavage-sequencing (ChEC-seq) technique [54] revealed Sfp1's robust association with (RRPE-like) gAAAATTTTc motifs at RiBi gene promoters and those of a large group of additional growth-associated genes [55]. This, and the fact that cytoplasmic anchoring of Sfp1 leads to strong RiBi and RiBi-like gene down-regulation in otherwise unstressed cells, suggests that Sfp1 is a direct activator whose promoter release and re-location to the cytoplasm is sufficient to cause a rapid and strong decrease in transcription of these genes in the absence of active repression pathways [55]. Stb3, and perhaps Dot6/Tod6, may instead be required for the more long-term and complete transcriptional shutdown associated with entry into quiescence [56]. Of note, Stb3 plays a more prominent role in RP, as opposed to RiBi gene repression [52], where its binding motif, but not the more complex RRPE element, is frequently found. Nevertheless, future studies will be required to quantify the relative contribution of activation and repression mechanisms as a function of time during different nutrient- and stress-induced transitions at both RiBi and RP genes.

Expression of several RiBi genes has also been shown to be partly dependent on upstream promoter binding of a GRF (e.g. Abf1, Reb1 or Tbf1; [57]). However, binding of these factors to RiBi gene promoters is not known to be regulated, unlike the case for Sfp1, which is rapidly translocated to the cytoplasm following stress [6,11,26,58]. It will be interesting to determine whether the GRFs act by promoting a chromatin environment more permissive to Sfp1 binding, or instead act in some other, perhaps more direct fashion, to stimulate transcription initiation.

It is worth highlighting here a striking duality in Sfp1's mode of promoter binding, as well as its detection *in vivo*. As mentioned above, Sfp1 binding is detected by ChIP at Category I and II RPGs, though usually with low enrichment, but not at RiBi genes. Conversely, Sfp1 binding is readily detected by ChEC at RiBi genes, as well as an equally large group of growth-associated genes [55], but not at RPGs. This dichotomy almost certainly reflects two distinct modes of Sfp1 promoter binding [55], based upon several observations. First, ChIP-detected Sfp1 binding at Category I and II RPGs, as well as that observed at the promoters of a large group of genes activated during the G1/S cell cycle transition, is not associated with the gAAAATTTTc motif to which Sfp1 binds *in vitro*. Furthermore, Sfp1 binding at Category I and II RPGs is strongly reduced by nuclear depletion of Ifh1. Similarly, Sfp1 binding at promoters in the G1/S regulon is abrogated by depletion of Swi4, a TF specific for these genes. Finally, the importance of the gAAAATTTTc motif for *in vivo* Sfp1 binding, for example at RiBi genes, has been demonstrated recently through endogenous site mutagenesis [59]. Taken together, these findings suggest that Sfp1 is indirectly promoter-bound at RP and G1/S regulon genes, primarily through interactions with other TFs, and possibly independent of a sequence-specific DNA interaction. Why this mode of binding is not detected by ChEC remains unclear, though may be due to its transient nature, since formaldehyde crosslinking renders it ChEC-detectable (B.A., unpublished data). The failure to detect Sfp1 binding at RiBi and Category III RPG promoters by ChIP, even though in these cases its binding would appear to result from a direct interaction with the gAAAATTTTc motif, may be due to poor crosslinking efficiency for A/T relative to G/C base pairs [60].

Finally, we note an additional common feature of RP and RiBi genes, namely their frequent clustering in gene pairs that display increased co-regulation under various stress conditions compared to those genes that are not present in clusters [61–64]. This feature is shared with some other functional groups of genes in yeast [65] and in higher eukaryotes and is proposed to result from enhancer-promoter interactions whose strength as a function of distance scales with genome size [66]. Our improved understanding of the TFs involved in RP and RiBi gene regulation may facilitate the exploration of mechanisms underlying correlated expression of those genes found in close proximity to each other.

## The rapamycin target protein Fpr1 acts as a TF at RPGs

As alluded to above, the yeast FKBP12 prolyl isomerase Fpr1 [67], which also mediates the rapamycin-induced inhibition of TORC1 and interacts physically and genetically with Hmo1, has been identified recently as a novel TF at RPGs [28]. Fpr1 is robustly detected by ChIP at the promoters of most RPGs (95%; thus, not exclusively at those bound by Hmo1) and at very few (~10) other genes. One common feature of the sites where Fpr1 binding is detected is the presence of Rap1, and deletion of the Rap1 binding site at the *RPL25* promoter does indeed abolish Fpr1 binding there. Nevertheless, there are many other promoters bound by Rap1 where Fpr1 binding is not observed. The determinants of Fpr1 binding specificity thus remain to be unraveled. Interestingly, the rapamycin binding activity of Fpr1, but not its proline isomerase activity, is required for its RPG promoter binding and transcriptional activation. However, genetic studies clearly indicated that Fpr1's effect on RPGs is independent from its interaction with TORC1 ([68]; reviewed in [69]).

The effect of *fpr1Δ* on RPG transcription is less than one might expect given its widespread binding, with only four RPGs showing a significant decrease in steady-state mRNA levels, compared to the ~50 genes affected by *hmo1Δ* [28]. Interestingly, an *fpr1Δ hmo1Δ* double mutant displays a number of additive or synergistic decreases in transcription of specific RPGs, consistent with its severe slow-growth phenotype (or lethality; [67]). Remarkably, *fpr1Δ hmo1Δ* can be rescued by an extra gene copy of *RPL25*, whose transcription is strongly impaired in *fpr1Δ hmo1Δ* cells [28]. Exactly how Fpr1 contributes to RPG transcription is still unclear but appears to be related to an effect on the Fhl1/Ihf1 activator pair, as is the case for Hmo1. Rapid degradation of Fpr1 via the auxin-induced degron system results in a significant decrease in Fhl1 ChIP-seq signal at many RPGs [28], similar to that reported for *hmo1Δ*. Again, though, the significance of this finding is unclear, since both the transcriptional and growth phenotypes of *fhl1Δ* are much more severe than those of *fpr1Δ*. Furthermore, *Ihf1* depletion by anchor-away, which is carried out in a *fpr1Δ* strain background, clearly points to a major role for *Ihf1* in both activation and regulation of RPGs that operates independently of Fpr1 [32].

The identification of Fpr1 as a novel TF highlights a persistent mystery regarding the binding specificity of the constellation of TFs found at RPGs. Indeed, only Rap1 binding consistently correlates with the presence of a recognizable binding motif. Fhl1, a forkhead-domain protein, recognizes a specific motif *in vitro* [10,47,70] yet uses this capability to augment its binding at only a small fraction of RPGs [10]. Sfp1, as pointed out above, appears not to use its sequence-specific binding mode at most (Category I and II) RPGs, but instead relies on *Ihf1*, and perhaps other factors. Hmo1 may rely upon multiple G/C-rich motifs similar to the IFHL motif to generate strong binding at Category I promoters [10,32]. Fpr1, on the other hand, contains no known DNA-binding motif and its high degree of specificity for RPG promoters remains unexplained. Though Rap1 binding may be necessary for association of Fpr1 at RPG promoters [28], it cannot be sufficient given the large number of non-RPG promoters that bind Rap1 but not Fpr1. One is thus left with the impression that the majority of RPG TFs rely upon small networks of cooperative interactions (protein–protein and/or protein–DNA) to achieve specificity. Future studies will clearly be required to resolve this issue.

## Ribosome biogenesis and protein homeostasis are tightly coupled

Previous studies have pointed to links between ribosome biogenesis and protein homeostasis (proteostasis). For example, the primary source of ubiquitin in growing yeast, and probably most metazoan cells, comes in the form of N-terminal protein fusions to two specific ribosomal proteins [71,72], thus directly linking ubiquitin availability to RPG expression. In addition, deletion of *TOM1*, which encodes a E3 ubiquitin ligase primarily dedicated to the degradation of unassembled RPs, profoundly impacts cellular proteostasis [73,74]. Two recent reports [44,75] have now revealed that ribosome biogenesis itself can be a major endogenous source of proteostasis stress, which provokes an adaptive response that we refer to as the ribosome assembly stress response (RASTR). RASTR is a consequence of the frenetic pace of ribosome assembly in rapidly growing cells, which, even in the absence of external stress, generates a pool of unassembled ('orphan') RPs that is sensed by the cellular protein homeostasis system. Numerous chemical and genetic perturbations of ribosome assembly only serve to augment the level of aggregation-prone orphan RPs and reveal a highly specific effect on transcription by RNAPII: up-regulation of heat shock factor 1 (Hsf1) target genes and down-regulation of RPGs. Activation of Hsf1 is probably due to relief of negative regulation by the Hsp70 proteins Ssa1/2, perhaps through effects on the essential Hsp40 co-chaperone Sis1 [76,77]. RP down-regulation, on the other hand, turns out to result from the rapid release of *Ihf1* from RPG promoters, coincident with its accumulation in nuclear aggregates [44].

Remarkably, then, excess unassembled RPs negatively regulate the genes that encode for them through sequestration of their key transcriptional activator, Ifh1. Significantly, Ifh1 appears to be largely composed of intrinsically disordered domains (IDRs; <http://original.disprot.org/metapredictor.php>), a common feature of proteins capable of forming liquid–liquid phase separated condensates [78]. Although the nature and underlying mechanisms driving Ifh1 condensation are unknown, it is interesting to note that Ifh1 contains highly

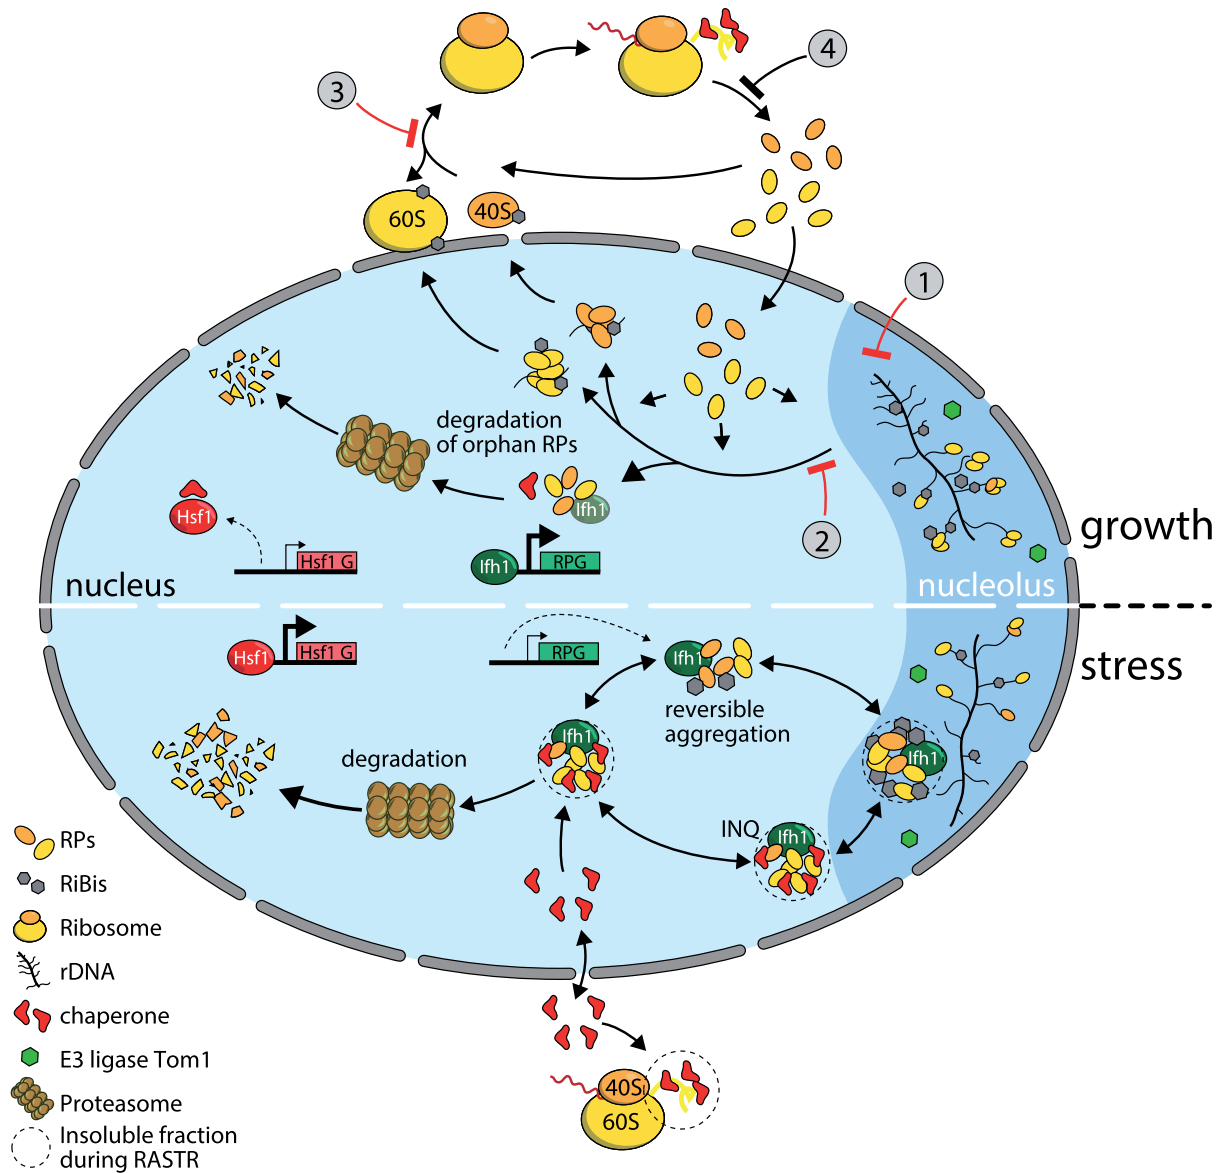

**Figure 2. Schematic view of the ribosome biogenesis – proteostasis connection.**

The top half indicates flow through the system under normal growth, the bottom under RASTR conditions. Important elements not directly labeled are indicated in the key (bottom left). Numbers indicate steps that have been blocked by genetic or chemical perturbations [44,75]: (1) rRNA transcription by Top1 degradation; (2) ribosome assembly by Utp8 or Utp13 degradation; (3) ribosome assembly by diazaborine treatment; (4) RP translation by cycloheximide treatment. A specific block of RPG transcription by Ifh1 anchor-away (not indicated here) dampens Hsf1 activation in otherwise wild-type conditions or in combination with RASTR activation [44]. The presence of Ifh1 in nucleolar, INQ (intranuclear quality control compartment; [92,93]) and nuclear aggregates containing RPs is based upon preliminary observations (B. A., unpublished results) and should be considered speculative at this point. Similarly, the nucleolar localization of the E3 enzyme Tom1 is supported by unpublished observations (<https://yeastgfp.yeastgenome.org/displayLocImage.-php?loc=22199> and B.A.).

acidic regions that might promote its aggregation with basic IDRs of orphan RPs [79]. It will clearly be important to identify regions of Ifh1 required for its regulated condensation as well as the possible involvement of covalent modification (e.g. phosphorylation [80] and acetylation) in controlling this process.

This transcriptional arm of RASTR appears to be a highly adaptive response since most Hsf1 target genes encode for chaperones of proteasome components and the Ifh1 activator is quite specific for RPGs, whose products are responsible for generating the stress in the first place. It is worth pointing out here that RASTR is accompanied not only by reduced solubility of RPs and Ifh1, but by condensation of a significant number of additional proteins, many of which are involved in ribosome assembly and translation [44,75]. A schematic depiction of some of the key features of RASTR is presented in Figure 2.

The notion that RASTR operates even in unstressed rapidly growing cells follows from the observation that treatment of cells with cycloheximide provokes an opposite transcriptional response: up-regulation of RPGs and down-regulation of Hsf1 target genes, suggesting that even under these conditions Ifh1 activity is mildly suppressed and Hsf1 partially activated. In fact, RASTR itself requires ongoing protein synthesis and is attenuated by cycloheximide treatment or by specific reduction of RPG transcription by nuclear depletion of Ifh1, even in cells where ribosome assembly is simultaneously perturbed [44]. Remarkably, the cycloheximide-sensitive transcriptional response characteristic of RASTR is observed in other stress conditions, such as heat shock or TORC1 inhibition by rapamycin treatment [44]. This may be a consequence of the rapid inhibition of RNAPI activity and arrest in rRNA production under a wide variety of stress conditions, which may quickly lead to a spike in unassembled RPs, should their translation continue more or less unabated. The observation that RASTR is induced by different stresses not obviously associated with ribosome assembly raises the question of whether Ifh1 sequestration in dynamic condensates is the sole mechanism conferring rapid RPG down-regulation in response to stress. As mentioned above, Ifh1 is subject to extensive covalent modification, for example by CK2 phosphorylation, which influences its interaction with the Fhl1 FHA domain [37,42], and through acetylation by the SAGA-associated Gcn5 lysine acetyltransferase enzyme, which both stabilizes Ifh1 and acts to dampen its activation function following a glucose pulse [39,40]. Furthermore, PKA-dependent phosphorylation of Ifh1 acts to limit replicative lifespan with no apparent effect on RPG transcription rates [39]. Mutations that abrogate these and other modifications have yet to be tested explicitly for effects on rapid Ifh1 promoter release during stress.

We recently found [32] that proteotoxic stress (induced either by heat shock or perturbation of ribosome biogenesis by rapid topoisomerase depletion) also causes the release of Hmo1 from Category I RPG promoters. Whether this contributes to their down-regulation under these conditions is not yet known but would appear to be unlikely since Hmo1 is not released from these promoters following rapamycin treatment [32], which also causes their strong and rapid down-regulation. As predicted by the minimal or non-existent role of Ifh1 at Category III promoters, they are significantly less down-regulated by RASTR compared to both Category I and II genes. Interestingly, a large number of Category III RPs have known dedicated chaperones, [81] which would in principle reduce their need for transcriptional down-regulation.

In summary, the two new studies outlined above [44,75] illuminate a regulatory mechanism in yeast that senses the quality of ribosome assembly, at least in part through the detection of unassembled orphan RPs and uses this information to restore protein homeostasis through specific transcriptional and post-transcriptional regulation. RASTR would appear to be a more evolutionarily ancient protein homeostasis mechanism than the well characterized p53-MDM2 system that monitors unassembled RPs. Although the conservation of RASTR in metazoans has yet to be explicitly addressed, several studies hint at its possible involvement in ribosomopathies [82,83] and cancer [84–87].

## Perspectives

- Ribosome biogenesis is a remarkably complex and energy-intensive process essential for rapid cell growth. The requirement to coordinate the production and assembly of nearly 80 ribosomal proteins with ribosomal RNA and to tune this process in response to fluctuating environmental conditions, imposes unique regulatory challenges, which are solved in yeast by the combinatorial action of multiple transcription factors deployed in more than three distinct configurations.

- Recent studies reveal that perturbations to ribosome biogenesis leading to an excess of unassembled ribosomal proteins induce a global yet highly focused protein homeostasis reaction, the ribosome assembly stress response. This multipronged regulatory system acts at transcriptional and post-transcriptional levels, via still poorly understood protein condensation mechanisms, to help restore cellular proteostasis.
- Future studies will explore the underlying molecular mechanisms that drive RASTR in yeast and provide a clearer understanding of how this response improves cell fitness under stress. We anticipate that new studies in metazoan systems will reveal the extent to which this system is evolutionarily conserved and its potential implication in development and disease, specifically in ribosomopathies but more generally in cancers, where ribosome biogenesis underlies rapid and uncontrolled proliferation.

### Competing Interests

The authors declare that there are no competing interests associated with the manuscript.

### Funding

D.S. acknowledges funding from the Swiss National Science Foundation (grant number 31003A\_170153) and the Republic and Canton of Geneva.

### Author Contributions

The manuscript was drafted by D.S. and revised by S.Z., B.A. and D.S.

### Acknowledgement

We would like to dedicate this review to the memory of Jonathan Warner, a towering figure in the ribosome biogenesis field whose insight, curiosity, enthusiasm and warmth are greatly missed. We thank Nicolas Roggli for his expert assistance with figure preparation and apologize to colleagues whose work could not be cited due to space limitations.

### Abbreviations

Abf1, ARS binding factor 1; CK2, casein kinase 2; CURI, CK2/Utp22/Rrp7/lfh1; FHA, forkhead-associated; Fhl1, forkhead-like 1; Fpr1, FK506-sensitive proline rotamase 1; GRF, General Regulatory Factor; Hmo1, high mobility group 1; lfh1, interacts with forkhead 1; INQ, intranuclear quality control compartment; Rap1, repressor/activator protein 1; RASTR, ribosome assembly stress response; RiBi, ribosome biogenesis; RNAPI, RNA polymerase I; RNAPII, RNA polymerase II; RNAPIII, RNA polymerase III; RP, ribosomal protein; RPG, ribosomal protein gene; rRNA, ribosomal RNA; Sfp1, split zinc-finger protein 1; TF, transcription factor; TSS, transcription start site.

### References

- 1 Lempiainen, H. and Shore, D. (2009) Growth control and ribosome biogenesis. *Curr. Opin. Cell Biol.* **21**, 855–863 <https://doi.org/10.1016/j.ceb.2009.09.002>
- 2 Warner, J.R. (1999) The economics of ribosome biosynthesis in yeast. *Trends Biochem. Sci.* **24**, 437–440 [https://doi.org/10.1016/S0968-0004\(99\)01460-7](https://doi.org/10.1016/S0968-0004(99)01460-7)
- 3 Woolford JL, J. and Baserga, S.J. (2013) Ribosome biogenesis in the yeast *Saccharomyces cerevisiae*. *Genetics* **195**, 643–681 <https://doi.org/10.1534/genetics.113.153197>
- 4 Jorgensen, P. and Tyers, M. (2004) How cells coordinate growth and division. *Curr. Biol.* **14**, R1014–R1027 <https://doi.org/10.1016/j.cub.2004.11.027>
- 5 Hall, D.B., Wade, J.T. and Struhl, K. (2006) An HMG protein, Hmo1, associates with promoters of many ribosomal protein genes and throughout the rRNA gene locus in *Saccharomyces cerevisiae*. *Mol. Cell. Biol.* **26**, 3672–3679 <https://doi.org/10.1128/MCB.26.9.3672-3679.2006>
- 6 Jorgensen, P., Rupes, I., Sharom, J.R., Schneper, L., Broach, J.R. and Tyers, M. (2004) A dynamic transcriptional network communicates growth potential to ribosome synthesis and critical cell size. *Genes Dev.* **18**, 2491–2505 <https://doi.org/10.1101/gad.1228804>
- 7 Kasahara, K., Ki, S., Aoyama, K., Takahashi, H. and Kokubo, T. (2008) *Saccharomyces cerevisiae* HMO1 interacts with TFIID and participates in start site selection by RNA polymerase II. *Nucleic Acids Res.* **36**, 1343–1357 <https://doi.org/10.1093/nar/gkm1068>



- 8 Kasahara, K., Ohtsuki, K., Ki, S., Aoyama, K., Takahashi, H., Kobayashi, T. et al. (2007) Assembly of regulatory factors on rRNA and ribosomal protein genes in *Saccharomyces cerevisiae*. *Mol. Cell. Biol.* **27**, 6686–6705 <https://doi.org/10.1128/MCB.00876-07>
- 9 Lee, T.I., Rinaldi, N.J., Robert, F., Odom, D.T., Bar-Joseph, Z., Gerber, G.K. et al. (2002) Transcriptional regulatory networks in *Saccharomyces cerevisiae*. *Science* **298**, 799–804 <https://doi.org/10.1126/science.1075090>
- 10 Knight, B., Kubik, S., Ghosh, B., Bruzzone, M.J., Geertz, M., Martin, V. et al. (2014) Two distinct promoter architectures centered on dynamic nucleosomes control ribosomal protein gene transcription. *Genes Dev.* **28**, 1695–1709 <https://doi.org/10.1101/gad.244434.114>
- 11 Marion, R.M., Regev, A., Segal, E., Barash, Y., Koller, D., Friedman, N. et al. (2004) Sfp1 is a stress- and nutrient-sensitive regulator of ribosomal protein gene expression. *Proc. Natl Acad. Sci. U.S.A.* **101**, 14315–14322 <https://doi.org/10.1073/pnas.0405353101>
- 12 Martin, D.E., Soulard, A. and Hall, M.N. (2004) TOR regulates ribosomal protein gene expression via PKA and the forkhead transcription factor FHL1. *Cell* **119**, 969–979 <https://doi.org/10.1016/j.cell.2004.11.047>
- 13 Reja, R., Vinayachandran, V., Ghosh, S. and Pugh, B.F. (2015) Molecular mechanisms of ribosomal protein gene coregulation. *Genes Dev.* **29**, 1942–1954 <https://doi.org/10.1101/gad.268896.115>
- 14 Rudra, D., Zhao, X. and Warner, J.R. (2005) Central role of Ifh1p-Fhl1p interaction in the synthesis of yeast ribosomal proteins. *EMBO J.* **24**, 533–542 <https://doi.org/10.1038/sj.emboj.7600553>
- 15 Schawaldner, S.B., Kabani, M., Howald, I., Choudhury, U., Werner, M. and Shore, D. (2004) Growth-regulated recruitment of the essential yeast ribosomal protein gene activator Ifh1. *Nature* **432**, 1058–1061 <https://doi.org/10.1038/nature03200>
- 16 Wade, J.T., Hall, D.B. and Struhl, K. (2004) The transcription factor Ifh1 is a key regulator of yeast ribosomal protein genes. *Nature* **432**, 1054–1058 <https://doi.org/10.1038/nature03175>
- 17 Buchman, A.R., Kimmerly, W.J., Rine, J. and Kornberg, R.D. (1988) Two DNA-binding factors recognize specific sequences at silencers, upstream activating sequences, autonomously replicating sequences, and telomeres in *Saccharomyces cerevisiae*. *Mol. Cell. Biol.* **8**, 210–225 <https://doi.org/10.1128/mcb.8.1.210-225.1988>
- 18 Buchman, A.R., Lue, N.F. and Kornberg, R.D. (1988) Connections between transcriptional activators, silencers, and telomeres as revealed by functional analysis of a yeast DNA-binding protein. *Mol. Cell. Biol.* **8**, 5086–5099 <https://doi.org/10.1128/mcb.8.12.5086-5099.1988>
- 19 Shore, D. (1994) RAP1: a protean regulator in yeast. *Trends Genet.* **10**, 408–412 [https://doi.org/10.1016/0168-9525\(94\)90058-2](https://doi.org/10.1016/0168-9525(94)90058-2)
- 20 Shore, D. and Nasmith, K. (1987) Purification and cloning of a DNA binding protein from yeast that binds to both silencer and activator elements. *Cell* **51**, 721–732 [https://doi.org/10.1016/0092-8674\(87\)90095-X](https://doi.org/10.1016/0092-8674(87)90095-X)
- 21 Vignais, M.L., Woudt, L.P., Wassenaar, G.M., Mager, W.H., Sentenac, A. and Planta, R.J. (1987) Specific binding of TUF factor to upstream activation sites of yeast ribosomal protein genes. *EMBO J.* **6**, 1451–1457 <https://doi.org/10.1002/j.1460-2075.1987.tb02386.x>
- 22 Mivelaz, M., Cao, A.M., Kubik, S., Zencir, S., Hovius, R., Boichenko, I. et al. (2020) Chromatin fiber invasion and nucleosome displacement by the Rap1 transcription factor. *Mol. Cell* **77**, 488–500.e9 <https://doi.org/10.1016/j.molcel.2019.10.025>
- 23 Lieb, J.D., Liu, X., Botstein, D. and Brown, P.O. (2001) Promoter-specific binding of Rap1 revealed by genome-wide maps of protein-DNA association. *Nat. Genet.* **28**, 327–334 <https://doi.org/10.1038/ng569>
- 24 Mallick, J. and Whiteway, M. (2013) The evolutionary rewiring of the ribosomal protein transcription pathway modifies the interaction of transcription factor heteromer Ifh1-Fhl1 (interacts with forkhead 1-forkhead-like 1) with the DNA-binding specificity element. *J. Biol. Chem.* **288**, 17508–17519 <https://doi.org/10.1074/jbc.M112.436683>
- 25 Rudra, D., Mallick, J., Zhao, Y. and Warner, J.R. (2007) Potential interface between ribosomal protein production and pre-rRNA processing. *Mol. Cell. Biol.* **27**, 4815–4824 <https://doi.org/10.1128/MCB.02062-06>
- 26 Lempiainen, H., Uotila, A., Urban, J., Dohnal, I., Ammerer, G., Loewith, R. et al. (2009) Sfp1 interaction with TORC1 and Mrs6 reveals feedback regulation on TOR signaling. *Mol. Cell* **33**, 704–716 <https://doi.org/10.1016/j.molcel.2009.01.034>
- 27 Berger, A.B., Decourty, L., Badis, G., Nehrbass, U., Jacquier, A. and Gadal, O. (2007) Hmo1 is required for TOR-dependent regulation of ribosomal protein gene transcription. *Mol. Cell. Biol.* **27**, 8015–8026 <https://doi.org/10.1128/MCB.01102-07>
- 28 Kasahara, K., Nakayama, R., Shiwa, Y., Kanesaki, Y., Ishige, T., Yoshikawa, H. et al. (2020) Fpr1, a primary target of rapamycin, functions as a transcription factor for ribosomal protein genes cooperatively with Hmo1 in *Saccharomyces cerevisiae*. *PLoS Genet.* **16**, e1008865 <https://doi.org/10.1371/journal.pgen.1008865>
- 29 Wade, C.H., Umbarger, M.A. and McAlear, M.A. (2006) The budding yeast rRNA and ribosome biosynthesis (RRB) regulon contains over 200 genes. *Yeast* **23**, 293–306 <https://doi.org/10.1002/yea.1353>
- 30 Haruki, H., Nishikawa, J. and Laemmli, U.K. (2008) The anchor-away technique: rapid, conditional establishment of yeast mutant phenotypes. *Mol. Cell* **31**, 925–932 <https://doi.org/10.1016/j.molcel.2008.07.020>
- 31 Bruzzone, M.J., Grunberg, S., Kubik, S., Zentner, G.E. and Shore, D. (2018) Distinct patterns of histone acetyltransferase and mediator deployment at yeast protein-coding genes. *Genes Dev.* **32**, 1252–1265 <https://doi.org/10.1101/gad.312173.118>
- 32 Zencir, S., Dilg, D., Rueda, M.P., Shore, D. and Albert, B. (2020) Mechanisms coordinating ribosomal protein gene transcription in response to stress. *Nucleic Acids Res.* **48**, 11408–11420 <https://doi.org/10.1093/nar/gkaa852>
- 33 Zhong, P. and Melcher, K. (2010) Identification and characterization of the activation domain of Ifh1, an activator of model TATA-less genes. *Biochem. Biophys. Res. Commun.* **392**, 77–82 <https://doi.org/10.1016/j.bbrc.2009.12.172>
- 34 Garbett, K.A., Tripathi, M.K., Cencki, B., Layer, J.H. and Weil, P.A. (2007) Yeast TFID serves as a coactivator for Rap1p by direct protein-protein interaction. *Mol. Cell. Biol.* **27**, 297–311 <https://doi.org/10.1128/MCB.01558-06>
- 35 Johnson, A.N. and Weil, P.A. (2017) Identification of a transcriptional activation domain in yeast repressor activator protein 1 (Rap1) using an altered DNA-binding specificity variant. *J. Biol. Chem.* **292**, 5705–5723 <https://doi.org/10.1074/jbc.M117.779181>
- 36 Sanborn, A.L., Yeh, B.T., Feigerle, J.T., Hao, C.V., Townshend, R.J.L., Lieberman-Aiden, E. et al. (2021) Simple biochemical features underlie transcriptional activation domain diversity and dynamic, fuzzy binding to mediator. *eLife* **10**, e68068 <https://doi.org/10.7554/eLife.68068>
- 37 Albert, B., Knight, B., Merwin, J., Martin, V., Otzto, D., Gloor, Y. et al. (2016) A molecular titration system coordinates ribosomal protein gene transcription with ribosomal RNA synthesis. *Mol. Cell* **64**, 720–733 <https://doi.org/10.1016/j.molcel.2016.10.003>
- 38 Laferte, A., Favry, E., Sentenac, A., Riva, M., Carles, C. and Chedin, S. (2006) The transcriptional activity of RNA polymerase I is a key determinant for the level of all ribosome components. *Genes Dev.* **20**, 2030–2040 <https://doi.org/10.1101/gad.386106>

- 39 Cai, L., McCormick, M.A., Kennedy, B.K. and Tu, B.P. (2013) Integration of multiple nutrient cues and regulation of lifespan by ribosomal transcription factor Ith1. *Cell Rep.* **4**, 1063–1071 <https://doi.org/10.1016/j.celrep.2013.08.016>
- 40 Downey, M., Knight, B., Vashisht, A.A., Seller, C.A., Wohlschlegel, J.A., Shore, D. et al. (2013) Gcn5 and sirtuins regulate acetylation of the ribosomal protein transcription factor Ith1. *Curr. Biol.* **23**, 1638–1648 <https://doi.org/10.1016/j.cub.2013.06.050>
- 41 Kim, E.M., Kim, J., Kim, Y.G., Lee, P., Shin, D.S., Kim, M. et al. (2011) Development of high-throughput phosphorylation profiling method for identification of Ser/Thr kinase specificity. *J. Pept. Sci.* **17**, 392–397 <https://doi.org/10.1002/psc.1312>
- 42 Kim, M.S. and Hahn, J.S. (2016) Role of CK2-dependent phosphorylation of Ith1 and Crf1 in transcriptional regulation of ribosomal protein genes in *Saccharomyces cerevisiae*. *Biochim. Biophys. Acta* **1859**, 1004–1013 <https://doi.org/10.1016/j.bbagr.2016.06.003>
- 43 Mason, A.G., Garza, R.M., McCormick, M.A., Patel, B., Kennedy, B.K., Pillus, L. et al. (2017) The replicative lifespan-extending deletion of SGF73 results in altered ribosomal gene expression in yeast. *Aging Cell* **16**, 785–796 <https://doi.org/10.1111/acel.12611>
- 44 Albert, B., Kos-Braun, I.C., Henras, A.K., Dez, C., Rueda, M.P., Zhang, X. et al. (2019) A ribosome assembly stress response regulates transcription to maintain proteome homeostasis. *eLife* **8**, e45002 <https://doi.org/10.7554/eLife.45002>
- 45 Fermi, B., Bosio, M.C. and Dieci, G. (2016) Promoter architecture and transcriptional regulation of Abf1-dependent ribosomal protein genes in *Saccharomyces cerevisiae*. *Nucleic Acids Res.* **44**, 6113–6126 <https://doi.org/10.1093/nar/gkw194>
- 46 Lascaris, R.F., Groot, E., Hoen, P.B., Mager, W.H. and Planta, R.J. (2000) Different roles for abf1p and a T-rich promoter element in nucleosome organization of the yeast RPS28A gene. *Nucleic Acids Res.* **28**, 1390–1396 <https://doi.org/10.1093/nar/28.6.1390>
- 47 Zhu, C., Byers, K.J., McCord, R.P., Shi, Z., Berger, M.F., Newburger, D.E. et al. (2009) High-resolution DNA-binding specificity analysis of yeast transcription factors. *Genome Res.* **19**, 556–566 <https://doi.org/10.1101/gr.090233.108>
- 48 Jorgensen, P., Nishikawa, J.L., Breikreutz, B.J. and Tyers, M. (2002) Systematic identification of pathways that couple cell growth and division in yeast. *Science* **297**, 395–400 <https://doi.org/10.1126/science.1070850>
- 49 Hughes, J.D., Estep, P.W., Tavazoie, S. and Church, G.M. (2000) Computational identification of cis-regulatory elements associated with groups of functionally related genes in *Saccharomyces cerevisiae*. *J. Mol. Biol.* **296**, 1205–1214 <https://doi.org/10.1006/jmbi.2000.3519>
- 50 Liko, D., Slattery, M.G. and Heideman, W. (2007) Stb3 binds to ribosomal RNA processing element motifs that control transcriptional responses to growth in *Saccharomyces cerevisiae*. *J. Biol. Chem.* **282**, 26623–26628 <https://doi.org/10.1074/jbc.M704762200>
- 51 Liko, D., Conway, M.K., Grunwald, D.S. and Heideman, W. (2010) Stb3 plays a role in the glucose-induced transition from quiescence to growth in *Saccharomyces cerevisiae*. *Genetics* **185**, 797–810 <https://doi.org/10.1534/genetics.110.116665>
- 52 Huber, A., French, S.L., Tekotte, H., Yerlikaya, S., Stahl, M., Perepelkina, M.P. et al. (2011) Sch9 regulates ribosome biogenesis via Stb3, Dot6 and Tod6 and the histone deacetylase complex RPD3L. *EMBO J.* **30**, 3052–3064 <https://doi.org/10.1038/emboj.2011.221>
- 53 Lippman, S.I. and Broach, J.R. (2009) Protein kinase A and TORC1 activate genes for ribosomal biogenesis by inactivating repressors encoded by Dot6 and its homolog Tod6. *Proc. Natl Acad. Sci. U.S.A.* **106**, 19928–19933 <https://doi.org/10.1073/pnas.0907027106>
- 54 Zentner, G.E., Kasinathan, S., Xin, B., Rohs, R. and Henikoff, S. (2015) ChEC-seq kinetics discriminates transcription factor binding sites by DNA sequence and shape in vivo. *Nat. Commun.* **6**, 8733 <https://doi.org/10.1038/ncomms9733>
- 55 Albert, B., Tomassetti, S., Gloor, Y., Dilg, D., Mattarocci, S., Kubik, S. et al. (2019) Sfp1 regulates transcriptional networks driving cell growth and division through multiple promoter-binding modes. *Genes Dev.* **33**, 288–293 <https://doi.org/10.1101/gad.322040.118>
- 56 McKnight, J.N., Boerma, J.W., Breeden, L.L. and Tsukiyama, T. (2015) Global promoter targeting of a conserved lysine deacetylase for transcriptional shutoff during quiescence entry. *Mol. Cell* **59**, 732–743 <https://doi.org/10.1016/j.molcel.2015.07.014>
- 57 Bosio, M.C., Fermi, B., Spagnoli, G., Levati, E., Rubbi, L., Ferrari, R. et al. (2017) Abf1 and other general regulatory factors control ribosome biogenesis gene expression in budding yeast. *Nucleic Acids Res.* **45**, 4493–4506 <https://doi.org/10.1093/nar/gkx058>
- 58 Singh, J. and Tyers, M. (2009) A Rab escort protein integrates the secretion system with TOR signaling and ribosome biogenesis. *Genes Dev.* **23**, 1944–1958 <https://doi.org/10.1101/gad.1804409>
- 59 Bruzzone, M.J., Albert, B., Hafner, L., Kubik, S., Lezaja, A., Mattarocci, S. et al. (2021) ChEC-seq: a robust method to identify protein-DNA interactions genome-wide. *bioRxiv* 2021.02.18.431798 <https://doi.org/10.1101/2021.02.18.431798>
- 60 Rossi, M.J., Lai, W.K.M. and Pugh, B.F. (2018) Genome-wide determinants of sequence-specific DNA binding of general regulatory factors. *Genome Res.* **28**, 497–508 <https://doi.org/10.1101/gr.229518.117>
- 61 Amone, J.T., Arace, J.R., Soomeedi, A.R., Citino, T.T., Kamitaki, T.L. and McAlear, M.A. (2014) Dissecting the cis and trans elements that regulate adjacent-gene coregulation in *Saccharomyces cerevisiae*. *Eukaryot Cell* **13**, 738–748 <https://doi.org/10.1128/EC.00317-13>
- 62 Cera, A., Holganza, M.K., Hardan, A.A., Gamarra, I., Eldabagh, R.S., Deschaine, M. et al. (2019) Functionally related genes cluster into genomic regions that coordinate transcription at a distance in *Saccharomyces cerevisiae*. *mSphere* **4**, e00063-19 <https://doi.org/10.1128/mSphere.00063-19>
- 63 Eldabagh, R.S., Mejia, N.G., Barrett, R.L., Monzo, C.R., So, M.K., Foley, J.J.T. et al. (2018) Systematic identification, characterization, and conservation of adjacent-gene coregulation in the budding yeast *Saccharomyces cerevisiae*. *mSphere* **3**, e00220-18 <https://doi.org/10.1128/mSphere.00220-18>
- 64 Hagee, D., Abu Hardan, A., Botero, J. and Amone, J.T. (2020) Genomic clustering within functionally related gene families in Ascomycota fungi. *Comput. Struct. Biotechnol. J.* **18**, 3267–3277 <https://doi.org/10.1016/j.csbj.2020.10.020>
- 65 Cohen, B.A., Mitra, R.D., Hughes, J.D. and Church, G.M. (2000) A computational analysis of whole-genome expression data reveals chromosomal domains of gene expression. *Nat. Genet.* **26**, 183–186 <https://doi.org/10.1038/79896>
- 66 Quintero-Cadena, P. and Sternberg, P.W. (2016) Enhancer sharing promotes neighborhoods of transcriptional regulation across eukaryotes. *G3 (Bethesda)* **6**, 4167–4174 <https://doi.org/10.1534/g3.116.036228>
- 67 Dolinski, K.J. and Heitman, J. (1999) Hmo1p, a high mobility group 1/2 homolog, genetically and physically interacts with the yeast FKBP12 prolyl isomerase. *Genetics* **151**, 935–944 <https://doi.org/10.1093/genetics/151.3.935>
- 68 Kasahara, K., Ohyama, Y. and Kokubo, T. (2011) Hmo1 directs pre-initiation complex assembly to an appropriate site on its target gene promoters by masking a nucleosome-free region. *Nucleic Acids Res.* **39**, 4136–4150 <https://doi.org/10.1093/nar/gkq1334>
- 69 Kasahara, K. (2021) Physiological function of FKBP12, a primary target of rapamycin/FK506: a newly identified role in transcription of ribosomal protein genes in yeast. *Curr. Genet.* **87**, 383–388 <https://doi.org/10.1007/s00294-020-01142-3>
- 70 Badis, G., Chan, E.T., van Bakel, H., Pena-Castillo, L., Tillo, D., Tsui, K. et al. (2008) A library of yeast transcription factor motifs reveals a widespread function for Rsc3 in targeting nucleosome exclusion at promoters. *Mol. Cell* **32**, 878–887 <https://doi.org/10.1016/j.molcel.2008.11.020>

- 71 Martin-Villanueva, S., Fernandez-Pevida, A., Fernandez-Fernandez, J., Kressler, D. and de la Cruz, J. (2020) Ubiquitin release from eL40 is required for cytoplasmic maturation and function of 60S ribosomal subunits in *Saccharomyces cerevisiae*. *FEBS J.* **287**, 345–360 <https://doi.org/10.1111/febs.14999>
- 72 Martin-Villanueva, S., Fernandez-Pevida, A., Kressler, D. and de la Cruz, J. (2019) The ubiquitin moiety of Ubi1 is required for productive expression of ribosomal protein eL40 in *Saccharomyces cerevisiae*. *Cells*. **8**, 850 <https://doi.org/10.3390/cells8080850>
- 73 Sung, M.K., Porras-Yakushi, T.R., Reitsma, J.M., Huber, F.M., Sweredoski, M.J., Hoelz, A. et al. (2016) A conserved quality-control pathway that mediates degradation of unassembled ribosomal proteins. *eLife* **5**, e19105 <https://doi.org/10.7554/eLife.19105>
- 74 Sung, M.K., Reitsma, J.M., Sweredoski, M.J., Hess, S. and Deshaies, R.J. (2016) Ribosomal proteins produced in excess are degraded by the ubiquitin-proteasome system. *Mol. Biol. Cell* **27**, 2642–2652 <https://doi.org/10.1091/mbc.e16-05-0290>
- 75 Tye, B.W., Commins, N., Ryazanova, L.V., Wuhr, M., Springer, M., Pincus, D. et al. (2019) Proteotoxicity from aberrant ribosome biogenesis compromises cell fitness. *eLife* **8**, e43002. <https://doi.org/10.7554/eLife.43002>
- 76 Feder, Z.A., Ali, A., Singh, A., Krakowiak, J., Zheng, X., Bindokas, V.P. et al. (2021) Subcellular localization of the J-protein Sis1 regulates the heat shock response. *J. Cell Biol.* **220**, e202005165 <https://doi.org/10.1083/jcb.202005165>
- 77 Klaiaps, C.L., Gropp, M.H.M., Hipp, M.S. and Hartl, F.U. (2020) Sis1 potentiates the stress response to protein aggregation and elevated temperature. *Nat. Commun.* **11**, 6271 <https://doi.org/10.1038/s41467-020-20000-x>
- 78 Alberti, S. and Hyman, A.A. (2021) Biomolecular condensates at the nexus of cellular stress, protein aggregation disease and ageing. *Nat. Rev. Mol. Cell Biol.* **22**, 196–213 <https://doi.org/10.1038/s41580-020-00326-6>
- 79 Peng, Z., Oldfield, C.J., Xue, B., Mizianty, M.J., Dunker, A.K., Kurgan, L. et al. (2014) A creature with a hundred waggly tails: intrinsically disordered proteins in the ribosome. *Cell. Mol. Life Sci.* **71**, 1477–1504 <https://doi.org/10.1007/s00018-013-1446-6>
- 80 Guo, Y.E., Manteiga, J.C., Henninger, J.E., Sabari, B.R., Dall'Agnesse, A., Hannett, N.M. et al. (2019) Pol II phosphorylation regulates a switch between transcriptional and splicing condensates. *Nature* **572**, 543–548 <https://doi.org/10.1038/s41586-019-1464-0>
- 81 Pillet, B., Mitterer, V., Kressler, D. and Pertschy, B. (2017) Hold on to your friends: dedicated chaperones of ribosomal proteins: dedicated chaperones mediate the safe transfer of ribosomal proteins to their site of pre-ribosome incorporation. *Bioessays* **39**, 1–12 <https://doi.org/10.1002/bies.201600153>
- 82 Baumgartner, M.E., Dinan, M.P., Langton, P.F., Kucinski, I. and Piddini, E. (2021) Proteotoxic stress is a driver of the loser status and cell competition. *Nat. Cell Biol.* **23**, 136–146 <https://doi.org/10.1038/s41556-020-00627-0>
- 83 Recasens-Alvarez, C., Alexandre, C., Kirkpatrick, J., Nojima, H., Huels, D.J., Snijders, A.P. et al. (2021) Ribosomopathy-associated mutations cause proteotoxic stress that is alleviated by TOR inhibition. *Nat. Cell Biol.* **23**, 127–135 <https://doi.org/10.1038/s41556-020-00626-1>
- 84 Bursac, S., Prodan, Y., Pullen, N., Bartek, J. and Volarevic, S. (2021) Dysregulated ribosome biogenesis reveals therapeutic liabilities in cancer. *Trends Cancer* **7**, 57–76 <https://doi.org/10.1016/j.trecan.2020.08.003>
- 85 Dai, C. (2018) The heat-shock, or HSF1-mediated proteotoxic stress, response in cancer: from proteomic stability to oncogenesis. *Phil. Trans. R. Soc. Lond. B. Biol. Sci.* **373**, 20160525 <https://doi.org/10.1098/rstb.2016.0525>
- 86 Mendillo, M.L., Santagata, S., Koeva, M., Bell, G.W., Hu, R., Tamimi, R.M. et al. (2012) HSF1 drives a transcriptional program distinct from heat shock to support highly malignant human cancers. *Cell* **150**, 549–562 <https://doi.org/10.1016/j.cell.2012.06.031>
- 87 Santagata, S., Mendillo, M.L., Tang, Y.C., Subramanian, A., Perley, C.C., Roche, S.P. et al. (2013) Tight coordination of protein translation and HSF1 activation supports the anabolic malignant state. *Science* **341**, 1238303 <https://doi.org/10.1126/science.1238303>
- 88 Brahma, S. and Henikoff, S. (2019) RSC-associated subnucleosomes define MNase-sensitive promoters in yeast. *Mol. Cell* **73**, 238–249e3 <https://doi.org/10.1016/j.molcel.2018.10.046>
- 89 Kubik, S., Bruzzone, M.J., Jacquet, P., Falcone, J.L., Rougemont, J. and Shore, D. (2015) Nucleosome stability distinguishes two different promoter types at all protein-coding genes in yeast. *Mol. Cell* **60**, 422–434 <https://doi.org/10.1016/j.molcel.2015.10.002>
- 90 Chereji, R.V., Ocampo, J. and Clark, D.J. (2017) MNase-sensitive complexes in yeast: nucleosomes and non-histone barriers. *Mol. Cell* **65**, 565–577e3 <https://doi.org/10.1016/j.molcel.2016.12.009>
- 91 Kubik, S., Bruzzone, M.J., Albert, B. and Shore, D. (2017) A reply to “MNase-sensitive complexes in yeast: nucleosomes and non-histone barriers,” by Chereji et al. *Mol. Cell* **65**, 578–580 <https://doi.org/10.1016/j.molcel.2017.01.010>
- 92 Miller, S.B., Ho, C.T., Winkler, J., Khokhrina, M., Neuner, A., Mohamed, M.Y. et al. (2015) Compartment-specific aggregases direct distinct nuclear and cytoplasmic aggregate deposition. *EMBO J.* **34**, 778–797 <https://doi.org/10.15252/embj.201489524>
- 93 Miller, S.B., Mogk, A. and Bukau, B. (2015) Spatially organized aggregation of misfolded proteins as cellular stress defense strategy. *J. Mol. Biol.* **427**, 1564–1574 <https://doi.org/10.1016/j.jmb.2015.02.006>
